# BMP signaling orchestrates a transcriptional network to control the fate of mesenchymal stem cells in mice

Jifan Feng<sup>1</sup>, Junjun Jing<sup>1,2</sup>, Jingyuan Li<sup>1</sup>, Hu Zhao<sup>1</sup>, Vasu Punj<sup>3</sup>, Tingwei Zhang<sup>1,2</sup>, Jian Xu<sup>1</sup> and Yang Chai<sup>1,\*</sup>

## ABSTRACT

Signaling pathways are used reiteratively in different developmental processes yet produce distinct cell fates through specific downstream transcription factors. In this study, we used tooth root development as a model with which to investigate how the BMP signaling pathway regulates transcriptional complexes to direct the fate determination of multipotent mesenchymal stem cells (MSCs). We first identified the MSC population supporting mouse molar root growth as Gli1<sup>+</sup> cells. Using a Gli1-driven Cre-mediated recombination system, our results provide the first *in vivo* evidence that BMP signaling activity is required for the odontogenic differentiation of MSCs. Specifically, we identified the transcription factors Pax9, Klf4, Satb2 and Lhx8 as being downstream of BMP signaling and expressed in a spatially restricted pattern that is potentially involved in determining distinct cellular identities within the dental mesenchyme. Finally, we found that overactivation of one key transcription factor, Klf4, which is associated with the odontogenic region, promotes odontogenic differentiation of MSCs. Collectively, our results demonstrate the functional significance of BMP signaling in regulating MSC fate during root development and shed light on how BMP signaling can achieve functional specificity in regulating diverse organ development.

**KEY WORDS:** BMP, Mesenchymal stem cells (MSCs), Odontogenesis, Gli1

## INTRODUCTION

During development and throughout life, tissue growth and homeostasis require tightly regulated proliferation and differentiation of immature precursor cells. Multipotent mesenchymal stem cells (MSCs), first reported in bone marrow, have been described in a variety of mesenchymal tissues with different developmental origins and physiological functions (Friedenstein et al., 1968, 1976; Bianco et al., 2008). These MSCs from different tissues are identified based on their common *in vitro* defining characteristics, including colony-forming ability, multipotency (osteo-, chondro- and adipogenic potentials) and the expression of MSC surface markers (Dominici et al., 2006). Despite these *in vitro* similarities, MSCs from various tissues undergo strict lineage-specific differentiation programs *in vivo*, faithful to their unique tissue origins and environment (Gronthos et al., 2000;

Beederman et al., 2013). To date, the *in vivo* identity of MSCs and the niche environment required for them to support tissue-specific growth have yet to be clearly elucidated.

During embryonic development, multipotent cells with MSC characteristics have been identified in sites where post-migratory cranial neural crest cells (CNCCs) reside (Chung et al., 2009). Similar to human teeth, mouse molar development includes crown formation followed by root initiation and subsequent root elongation. In mice, the molars cease growing after root development is complete and thus represent a good model for studying human tooth development. During late stages of molar development, the molar epithelium tissue degenerates and dissociates, which is due to the loss of Sox2<sup>+</sup> epithelial stem cells regulated by a BMP-SHH signaling cascade (Juuri et al., 2012; Li et al., 2015). In contrast, root development occurs mainly in the CNCC-derived mesenchymal tissue that forms the future pulp, dentin and periodontium.

This restricted apical growth of the molar also coincides with the presence of a distinct MSC population in humans, namely stem cells of the apical papilla (SCAPs) (Sonoyama et al., 2006, 2008). SCAPs exhibit classical MSC characteristics, as well as higher colony-forming efficiency and growth capacity than stem cells from the dental pulp of the adult tooth (Sonoyama et al., 2006, 2008). However, it remains unclear whether mice have a counterpart to human SCAPs and how this stem cell population undergoes odontogenic lineage commitment *in vivo* during tooth morphogenesis. We recently characterized an MSC population that resides in adult mouse incisors, which grow continuously throughout life (Zhao et al., 2014). Although blood vessel walls harbor a reservoir of MSCs in multiple tissues (Shi and Gronthos, 2003; Crisan et al., 2008), our cell lineage-tracing experiments have shown that Gli1<sup>+</sup> cells represent the stem cell population supporting tissue growth *in vivo*, the majority of which are not perivascular cells in adult mouse incisors and are not associated with the vasculature in the cranial sutures (Zhao et al., 2014, 2015). In addition, lineage tracing of NG2<sup>+</sup> perivascular cells in mouse molars demonstrated that these cells make only a limited contribution to molar mesenchyme development (Feng et al., 2011; Zhao et al., 2014), so the identity and location of mouse molar MSCs supporting tissue growth remains unclear.

Cell fate determination during tissue patterning and lineage commitment is often coordinated by signaling pathways via the activation or inhibition of transcription factors. These transcription factors regulate gene expression by acting synergistically or antagonistically, forming gene regulatory networks. During early embryonic development, BMPs play a crucial role in fate determination, including regulating cell fate, growth and patterning (Helms and Johnson, 2003; Zhang et al., 2013). Similarly, in the craniofacial region, mandibular domain identities are determined by the mutually antagonistic relationship between BMP and FGF signals from the oral epithelium by differentially

<sup>1</sup>Center for Craniofacial Molecular Biology, University of Southern California, Los Angeles, CA 90033, USA. <sup>2</sup>State Key Laboratory of Oral Diseases, West China Hospital of Stomatology, Sichuan University, Chengdu 610041, China.

<sup>3</sup>Department of Medicine, Keck School of Medicine, University of Southern California, Los Angeles, CA 90089, USA.

\*Author for correspondence (ychai@usc.edu)

 Y.C., 0000-0002-8943-0861

regulating transcription factors *Msx1/2*, *Barx1*, *Dlx2* and *Lhx6/7* in the CNC-derived mesenchyme (Tucker and Sharpe, 2004). In adult organs, BMP signaling helps maintain the stem cell population size by inhibiting stem cell proliferation and niche expansion (He et al., 2004). BMP signaling activity is also required for activating MSCs to undergo differentiation in cell culture (Beederman et al., 2013; Wei et al., 2013). However, it is not clear how BMP signaling controls MSC cell fate determination during tooth root development.

Here, we have identified the precise *in vivo* identity of the MSC population that is crucial for postnatal tooth development in the apical region of molars. These *Gli1*<sup>+</sup> cells are adjacent to, but more apical than, cells with active BMP signaling. Our results indicate that BMP signaling activity is indispensable for the activation of MSCs into their differentiation program. In addition, we identified potential downstream targets of BMP signaling, including spatially restricted transcription factors that may activate the odontogenic mesenchyme lineage program, such as *Klf4*. Thus, our findings suggest that BMP signaling orchestrates a transcriptional network that regulates mesenchymal stem cell lineage commitment.

## RESULTS

### Identification of putative mesenchymal stem cells (MSCs) in the developing molar apical mesenchyme

*Gli1* was recently identified as an *in vivo* marker for MSCs in the adult mouse incisor (Zhao et al., 2014), but it remained unclear whether a similar population of stem cells transiently exists to support mouse molar development. Our recent study also provided *in vivo* evidence that hedgehog signaling participates in root development and that *Gli1*<sup>+</sup> cells are crucial for root formation (Liu et al., 2015). To detect putative molar MSCs, we examined the detailed *Gli1* expression pattern in the molar apical mesenchyme during root formation. At birth, *Gli1* was expressed throughout the apical half of the dental mesenchyme (Fig. 1A). From this stage onwards, *Gli1*<sup>+</sup> cells became gradually restricted to the most apical region (Fig. 1A-D) and eventually were undetectable by the adult stage (Zhao et al., 2014), consistent with a transient presence of stem cells during root development. A similar expression pattern of *Gli1* mRNA was detectable at P3.5 and P7.5 using RNAscope *in situ* hybridization analysis (Fig. S1A-D). We performed lineage tracing of *Gli1*<sup>+</sup> cells from postnatal day 3.5 (P3.5), prior to the initiation of root formation (at P7.5). One day after labeling, *Gli1*<sup>+</sup> cells (tdTomato<sup>+</sup>) were located in the most apical region of the dental mesenchyme (Fig. 1E,F), with comparable expression to *Gli1-LacZ* mice. After two weeks, the progeny of these *Gli1*<sup>+</sup> cells were detectable throughout the newly formed root odontoblasts and pulp cells (Fig. 1G,H), indicating that the progeny of these *Gli1*<sup>+</sup> cells contribute to the entire root mesenchyme (Fig. 1I-L). Furthermore, *in vitro* assays showed that *Gli1*<sup>+</sup> cells also have classic MSC characteristics, including colony formation (Fig. 1M) and multilineage differentiation into osteoblasts, chondrocytes and adipocytes (Fig. 1N-P). Taken together, these results indicate that these *Gli1*<sup>+</sup> cells function as *in vivo* MSCs that support postnatal molar mesenchymal development.

### Activation of BMP signaling and commitment of dental mesenchymal cells

Because tooth development occurs from the crown to the root, cells in more coronal regions are progressively more differentiated than those in the apical region, consistent with the presence of *Gli1*<sup>+</sup> MSCs in the most apical part of the postnatal developing molar

mesenchyme. Previous studies have reported the presence of BMP ligands during all stages of tooth development, but the pattern of active BMP signaling remained unknown. We analyzed activated BMP signaling during root formation using pSmad1/5/8 expression as a readout. At E18.5, prior to the initiation of molar root formation, BMP activity is widespread but excluded from the apical region (Fig. S2A). From this stage onwards, BMP signaling persists in the developing molar mesenchyme, whereas the zone of exclusion becomes increasingly restricted in the apical region (Fig. S2A-D). In contrast, the zone of exclusion for BMP activity in the incisor is maintained postnatally and throughout adulthood (Fig. S2E-H). This difference is consistent with the persistence of stem cells in the incisor and the gradual loss of stem cells in the molar during later development. To investigate the relationship between BMP signaling and *Gli1*<sup>+</sup> MSCs at the onset of root initiation, we examined their expression pattern at P3.5. Activated BMP signaling (pSmad1/5/8) was localized more coronally than the *Gli1*<sup>+</sup> cells in the most apical region (Fig. 2A-C), suggesting that active BMP signaling is associated with more committed cells adjacent to but exclusive of the *Gli1*<sup>+</sup> MSCs. Similarly, lineage tracing of *Gli1*<sup>+</sup> cells confirmed this absence of BMP activity in the *Gli1*<sup>+</sup> MSC region (Fig. 2D). Two days after induction, *Gli1*<sup>+</sup> cells were present only in the most apical region (Fig. 2D'') and BMP signaling was more coronal than the *Gli1*<sup>+</sup> cells (Fig. 2D'). At later time points, progeny of these *Gli1*<sup>+</sup> cells became more committed as odontoblasts and as other dental pulp cells, and they colocalized to the region with activated BMP signaling (Fig. 2E), consistent with a requirement for BMP signaling for MSCs to become committed as odontoblasts and pulp tissue.

### BMP signaling is indispensable for *Gli1*<sup>+</sup> MSCs to initiate the apical growth of the root

Disruption of BMP signaling in the root mesenchyme before root formation in *Gli1-CreER;Bmpr1 $\alpha$ <sup>fl/fl</sup>* mice resulted in impaired root development (Fig. 3A-B,E-F). At P18.5, roots were well developed in control mice and the tooth was ready to erupt (Fig. 3A-B), whereas there was no histological structure resembling a root in *Gli1-CreER;Bmpr1 $\alpha$ <sup>fl/fl</sup>* mice, although the crown-to-root transition appeared to be unaffected (Fig. 3E-F). In addition, dentin formation was defective and no cells showing typical columnar odontoblast morphology were detectable in *Gli1-CreER;Bmpr1 $\alpha$ <sup>fl/fl</sup>* mice (Fig. 3E,F). Consistent with this, we failed to detect expression of odontoblast differentiation marker *Dspp* (dentin sialophosphoprotein) in the most apical region of *Gli1-CreER;Bmpr1 $\alpha$ <sup>fl/fl</sup>* mouse molars (Fig. 3C,G), suggesting there is a functional requirement for BMP signaling to initiate odontogenic differentiation in *Gli1*<sup>+</sup> MSCs. Next, we performed lineage tracing of *Gli1*<sup>+</sup> cells after loss of BMP signaling and found that their derivatives accumulated in the periapical region (Fig. 3H), failing to grow apically as seen in control mice (Fig. 3D). Moreover, the region of proliferative cells in the apical mesenchyme was expanded in *Gli1-CreER;Bmpr1 $\alpha$ <sup>fl/fl</sup>* mice at P7.5, particularly in the region close to the preodontoblast/odontoblast cells (Fig. 3I-L), possibly owing to the failure of these cells to enter into the odontogenic differentiation program. In contrast, ablating BMP signaling in the dental epithelium using *K14-rtTA;tetO-Cre;Bmpr1 $\alpha$ <sup>fl/fl</sup>* mice showed that epithelial BMP signaling is not specifically required to regulate the root pattern, length or dentin formation at postnatal stages (Fig. S3). Therefore, although *Gli1*<sup>+</sup> cells are also present in the dental epithelium, BMP signaling is specifically required to regulate the differentiation of MSCs during postnatal tooth root formation.



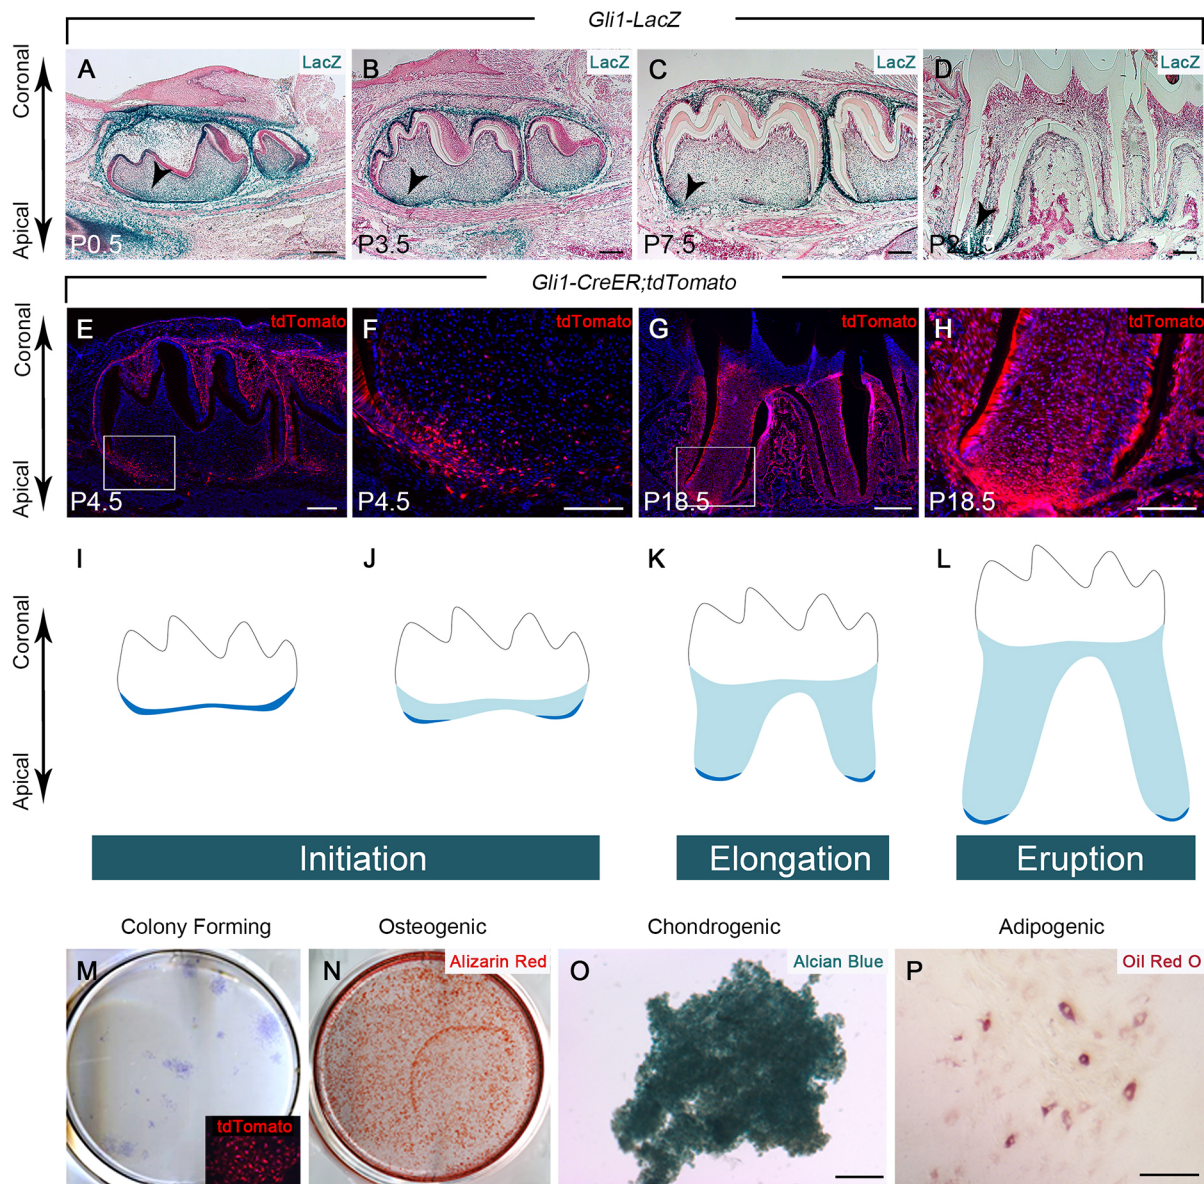

**Fig. 1. *Gli1* is an *in vivo* marker for MSCs in the developing molar apical mesenchyme.** (A-D) X-gal staining (blue) of sagittal sections of mandibular molars from *Gli1-LacZ* mice at P0.5, P3.5, P7.5 and P21.5. Arrowheads indicate *Gli1*<sup>+</sup> cells in the apical region of the mesenchyme. (E-H) Visualization of sagittal sections of mandibular molars from *Gli1-CreER;tdTomato* mice at P4.5 and P18.5 after induction at P3.5. The progeny of the *Gli1* lineage appear red. Boxes in E and G are shown at higher magnification in F and H, respectively. (I-L) Schematic drawing of *Gli1*<sup>+</sup> cells (dark blue, at the base of the developing root) and their progeny (light blue) contribute to root mesenchyme growth during root initiation (I,J), elongation (K) and eruption (L) stages. (M-P) Colony-forming assay and osteogenic, chondrogenic and adipogenic differentiation assays of cells from the *Gli1*<sup>+</sup> region in the apical mesenchyme of molars from P5.5 *Gli1-CreER;tdTomato* mice induced at P3.5. Toluidine Blue staining was used to visualize colony formation after culture for 2 weeks (M). Inset shows that colonies are derived from *Gli1*<sup>+</sup> cells (red). Alizarin Red (N), Alcian Blue (O) and Oil Red O (P) staining to detect osteogenic, chondrogenic and adipogenic differentiation after 3 weeks. Scale bars: 100  $\mu$ m.

### BMP signaling orchestrates a transcriptional network regulating mesenchymal stem cell lineage commitment

To identify downstream targets of BMP signaling in *Gli1*<sup>+</sup> MSCs as they become committed into odontoblasts, we analyzed gene expression profiles in the apical half of the molar mesenchyme using RNA-seq from *Gli1-CreER;Bmpr1 $\alpha$ <sup>fl/fl</sup>* and *Bmpr1 $\alpha$ <sup>fl/fl</sup>* control mice at P7.5. We harvested samples 4 days after tamoxifen induction because it takes ~2 days for tamoxifen to mediate Cre recombination and 2 days for *Gli1*<sup>+</sup> MSCs to start to commit into pre-odontoblasts, based on our results showing that proliferation was altered using the same induction regimen (see Fig. 3I-L). We identified a set of 242 genes that are differentially

expressed in *Gli1-CreER;Bmpr1 $\alpha$ <sup>fl/fl</sup>* versus *Bmpr1 $\alpha$ <sup>fl/fl</sup>* control mice (FDR  $P < 0.05$ ,  $n = 3$ ). A heat map of differentially expressed genes showed a distinct separation into two groups (Fig. 4A). Of these 242 genes, 169 were upregulated and 73 were downregulated, as indicated by representative mouse genome screen shots (Fig. 4B).

Pathway enrichment assay demonstrated that, in addition to the *Bmp2* target genes, genes related to extracellular matrix proteins, cell adhesion, facial morphology, receptor binding and cell proliferation were all among the most enriched categories (Fig. 4C). We focused on the 29 transcription factors, because these regulatory genes play crucial roles in cell fate determination (Table S1). In particular, we targeted transcription factors associated

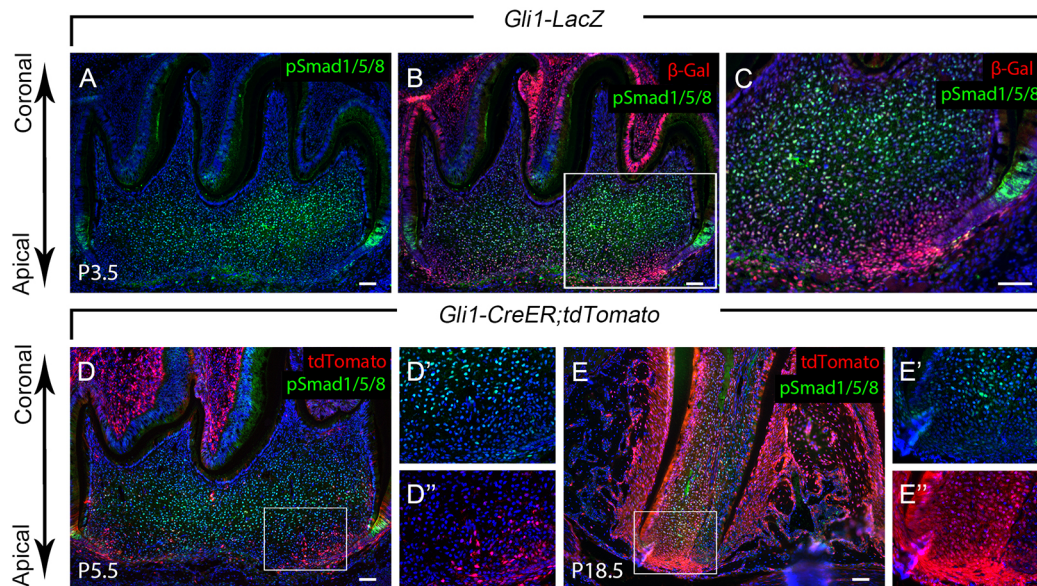

**Fig. 2. Colocalization of activated BMP signaling (pSmad1/5/8) and  $Gli1^+$  MSCs and their progeny in developing roots.** (A-C) pSmad1/5/8 (green) and  $\beta$ -gal (red) immunostaining of sagittal sections of mandibular molars from P3.5 *Gli1-LacZ* mice. pSmad1/5/8 indicates activated BMP signaling and  $\beta$ -gal indicates *Gli1* expression. Boxed area in B is shown at higher magnification in C. (D-E'') pSmad1/5/8 immunostaining (green) and visualization of tdTomato (red) of sagittal sections of mandibular molars from *Gli1-CreER;tdTomato* mice at P5.5 and P18.5 after induction at P3.5. The progeny of the *Gli1* lineage appear red. Boxes in D and E are shown at higher magnification in D', D'', and E', E'', respectively. D' and E' show pSmad1/5/8 staining; D'' and E'' show tdTomato visualization alone. Scale bars: 100  $\mu$ m.

with early craniofacial and tooth development, such as *Klf4*, for further study. In addition, we identified other factors, such as *Pax9*, as interesting candidates among the altered genes.

Because the RNA-seq experiment assayed a heterogeneous population, we confirmed the alteration in expression of interesting candidates in the apical mesenchyme *in vivo*. At P7.5,  $Gli1^+$  cells had begun to contribute to a small amount of growth, resulting in a protrusion of the apical papilla, whereas BMP activity was located more coronally in the pulp, as well as in the pre-odontoblast/odontoblast region (Fig. 5A,A'). In *Gli1-CreER;Bmpr1 $\alpha$ <sup>fl/fl</sup>* mice, the region of pSmad1/5/8 activity was restricted more coronally and was undetectable in the pre-odontoblast/odontoblast region and in the pulp mesenchyme (Fig. 5B,B'). In the same region, we observed several spatially restricted patterns of transcription factors, suggesting their involvement in determining distinct cellular identities within the dental mesenchyme. For example, in control mice, transcription factors such as *Pax9* were detectable in the most apical region (Fig. 5C,C'), comparable with *Gli1* expression. In contrast, *Lhx8*, *Satb2* and *Klf4* were closely associated with the odontogenic (pre-odontoblast/odontoblast) region (Fig. 5E,E',G,G',I,I'). Furthermore, we found that loss of BMP signaling in the apical region led to alterations in this network. In *Gli1-CreER;Bmpr1 $\alpha$ <sup>fl/fl</sup>* mice, *Pax9* expression was expanded more coronally towards the pulp and odontogenic region (Fig. 5D,D'), whereas expression of *Lhx8*, *Satb2* and *Klf4* was reduced (Fig. 5F,F',H,H',J,J'). These data suggest that BMP signaling fine-tunes the spatial distribution of this signaling network by activating differentiation related transcription factors and inhibiting transcription factors involved in stem cell maintenance.

#### BMP regulates dental pulp tissue differentiation via activation of *Klf4* expression

Among the transcription factors associated with pre-odontoblast/odontoblast identity, we noticed that the expression of *Klf4* was

closely adjacent to but excluded from the proliferative cells (Fig. 6A-B'), suggesting that *Klf4* may promote cell differentiation. Moreover, we found that *Klf4* expression was restricted to the pre-odontoblast region and levels appeared decreased in the region of mature odontoblasts (Fig. 6A), suggesting that *Klf4* might function as a switch for odontoblast differentiation. We show above that pSmad1/5/8 expression overlapped with *Klf4* expression in the apical region of the molar mesenchyme (see Fig. 5A,A',I,I'). In addition, *Bmp2* or *Bmp4* treatment resulted in elevated *Klf4* expression in dental pulp cells (Fig. 6C). Previous studies have suggested that *Klf4* directly interacts with the MH2 domain of Smad3 to control activation of its target genes (Hu et al., 2007). Because the MH2 domain is conserved between R-Smads, we tested whether *Klf4* was also able to interact with Smad1. Indeed, we found that *Klf4* co-immunoprecipitated with Smad1 (Fig. 6D), suggesting that BMP may not only activate but also interact with *Klf4* in regulating the specificity of odontogenesis. To test whether *Klf4* may play a key role in regulating odontogenic differentiation, we used an adenovirus vector approach to activate it transiently in the apical mesenchyme of wild-type P5.5 molar explants *in vitro*. We found that mouse *Klf4* proteins were robustly expressed following infection with adenovirus Ad-m-*Klf4* vectors (Fig. 6E,E'). Moreover, overexpression of *Klf4* promoted odontoblast differentiation based on its significant activation of odontoblast-specific marker *Dspp* in dissociated apical pulp culture (Fig. 6F). Taken together, our data suggest that *Klf4* is spatially restricted to the odontogenic region and may be a key regulator of the transcriptional network downstream of BMP that controls odontoblast differentiation of MSCs during root development.

#### DISCUSSION

In this work we have identified the MSC population in mouse molars as  $Gli1^+$  cells, using *in vivo* genetic cell lineage study and *in*



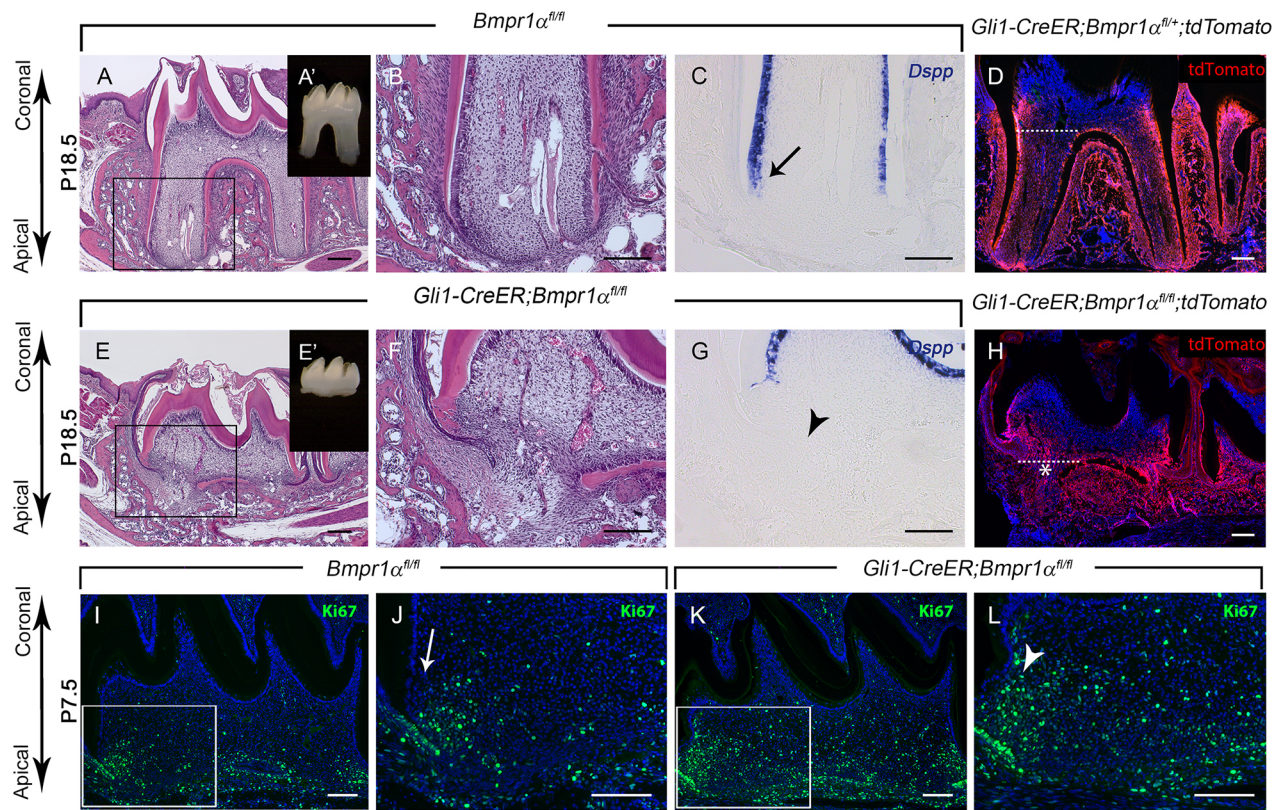

**Fig. 3. Disruption of BMP signaling in the root mesenchyme results in a differentiation defect.** (A-C,E-G) Hematoxylin and Eosin staining (A,B,E,F), gross morphology of tooth (A',E') and *Dsp* *in situ* hybridization (purple; C,G) of sagittal sections of mandibular molars of E18.5 littermate *Bmpr1α<sup>fl/fl</sup>* control and *Gli1-CreER;Bmpr1α<sup>fl/fl</sup>* mice after induction at P3.5. Boxed areas in A and E are shown at higher magnification in B and F, respectively. Arrow in C indicates positive *Dsp* staining; arrowhead in D indicates absence of staining. (D,H) Visualization of sagittal sections of mandibular molars from P18.5 littermate *Gli1-CreER;Bmpr1α<sup>fl/fl</sup>;tdTomato* control and *Gli1-CreER;Bmpr1α<sup>fl/fl</sup>;tdTomato* mice after induction at P3.5. The progeny of the *Gli1* lineage appear red. Asterisk indicates *Gli1* derivatives in the periapical region and dotted lines indicate crown-root junction. (I-L) Ki67 immunostaining (green) of P7.5 littermate *Bmpr1α<sup>fl/fl</sup>* control and *Gli1-CreER;Bmpr1α<sup>fl/fl</sup>* mice induced at P3.5. Boxes in I and K are shown at higher magnification in J and L, respectively. Arrowhead indicates the expansion of the Ki67<sup>+</sup> proliferative area (L) compared with control (arrow in J). Scale bars: 100 μm.

*in vitro* differentiation criteria. Interestingly, BMP signaling is activated when dental mesenchyme cells become committed into odontoblasts, which are adjacent to, but exclusive from, the most apical *Gli1*<sup>+</sup> MSCs. In addition, we identified potential downstream targets of BMP signaling in root development associated with differentiation defects, including specific transcription factors such as *Klf4*, *Satb2* and *Lhx8*. Specifically, *Klf4* may be a key player in activating the odontogenic mesenchymal lineage commitment. In addition, *Pax9* is located in the most apical region overlapping with *Gli1*<sup>+</sup> cells and is upregulated in roots of *Gli1-CreER;Bmpr1α<sup>fl/fl</sup>* mice that contain an increased number of uncommitted cells, suggesting that *Pax9* may be a new marker for MSCs and may help to maintain MSCs in an undifferentiated state. Moreover, our results indicate that BMP signaling activity is required for the lineage commitment of MSCs and, consequently, the initiation of apical growth of the molar root.

#### Dynamic activation pattern of BMP signaling may define the stem cell niche environment supporting tooth root growth

We reported here that *Gli1*<sup>+</sup> MSCs are present transiently in the developing molar, and previous studies have shown that they are not detectable in adult molars when tissue growth has ceased (Zhao et al., 2014), consistent with the physiological requirement for finite growth of the molar. The transient nature of these *Gli1*<sup>+</sup> MSCs in the molar root region indicates that they do not maintain

self-renewal capacity *in vivo*, one of the defining characteristics that distinguish stem cells from more committed progenitor cells. In contrast, under inductive conditions *in vitro*, both these *Gli1*<sup>+</sup> cells and SCAPs, their putative human counterparts, exhibit the same differentiation potential as adult MSCs, as well as showing clonogenic ability that indicates a self-renewal capability (Sonoyama et al., 2006, 2008). Stem cells have historically been classified as either embryonic stem cells, which are derived from blastocysts, or as adult stem cells, which are undifferentiated cells in the body and are necessary to replenish tissues as they undergo turnover or injury repair. This classification leads to ambiguity in distinguishing cells with stem cell properties from multipotent precursor cells supporting embryonic and postnatal development. Increasingly, more cell populations with stem cell properties have been identified from multipotent embryonic precursor cells. For example, in the neural crest, a transient multipotent stem cell population was reported to possess high self-renewal ability *in vitro* (Stemple and Anderson, 1992). The transient nature of stem cells involved in development may be due to the loss of their niche environment rather than to an intrinsic inability to undergo self-replication, as seen in classical adult stem cells. Therefore, it is crucial to gain a better understanding of the stem cell niche environment in order to investigate its functions in controlling the fate of MSCs during tissue growth, homeostasis and regeneration.

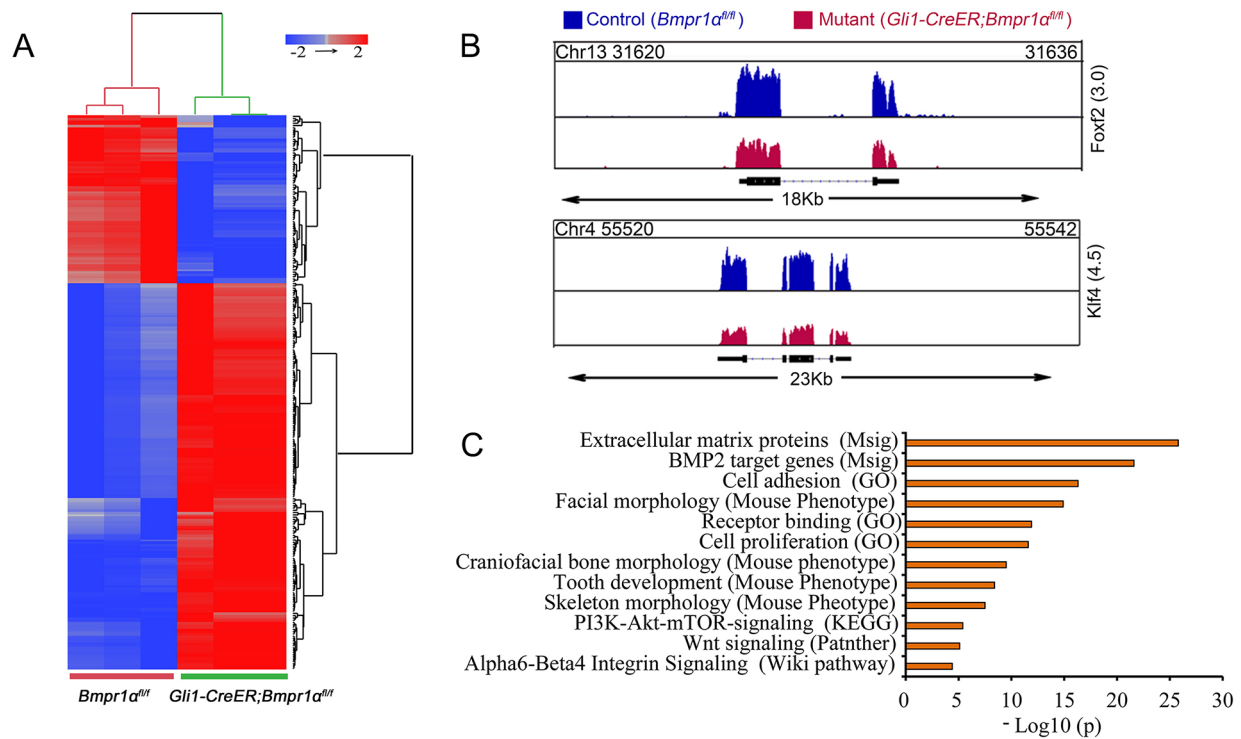

**Fig. 4. Downstream target gene analysis of *Gli1-CreER;Bmpr1α<sup>fl/fl</sup>* mutant mice compared with *Bmpr1α<sup>fl/fl</sup>* control mice.** (A) Heat map of 242 genes (FDR  $P < 0.05$ ) differentially expressed in *Gli1-CreER;Bmpr1α<sup>fl/fl</sup>* and *Bmpr1α<sup>fl/fl</sup>* mice. (B) Mouse genomic snapshots of two representative genes (*Klf4* and *Foxf2*) identified in RNA-seq analysis of *Gli1-CreER;Bmpr1α<sup>fl/fl</sup>* apical molars, showing downregulation (blue) relative to their matched controls (red). The genomic location of each gene is shown below. Numbers in parentheses on the right indicate sequencing depth. (C) Pathway analysis from RNA-seq data. Each enriched pathway is ranked based on the  $P$  value that was computed from the binomial distribution and independence for probability. The relevant database is indicated in parentheses.

During molar root formation, the zone of BMP activity associated with more committed cells gradually expands as  $Gli1^+$  cells disappear, suggesting that the dynamic spatial and temporal regulation of BMP activity may play a role in regulating the stem cell niche disappearance. In contrast, the pattern of BMP activity in the incisors is maintained in a restricted region from newborn stage onwards, adjacent to the incisor  $Gli1^+$  MSCs that support the continuous apical growth of the incisor (see Fig. S2). This dynamic niche remodeling adapted for developmental growth supports the notion that these  $Gli1^+$  stem cells in molars are bona fide stem cells and that the different destinies of  $Gli1^+$  stem cells in incisors and molars may be largely associated with changes in the *in vivo* niche environment that promote maintenance or differentiation of stem cells. Increasing evidence supports the idea that niches are not static, but rather persist for varying lengths of time and may be established or disappear at different time points, presumably in response to changing needs of the tissue (Calvi and Link, 2015). Similarly, the niche that harbors the stem cell population supporting tissue growth may gradually disappear as the organism reaches maturity, while a new niche is established to support a population of adult stem cells for tissue repair following injury. For example, although  $Gli1^+$  MSCs disappear during root development, their derivatives contribute to the entire pulp tissue, including the perivascular cells. This finding suggests that MSCs that support tissue development may be the source of the tissue-specific MSCs recruited to and maintained by the perivascular stem cell niche that function as adult stem cells and participate in injury repair (Bianco et al., 2008; Feng et al., 2011). Taken together, our results demonstrate that murine tooth development

offers an excellent *in vivo* model for studying mesenchymal stem cells.

#### A BMP-regulated transcription factor network controls odontoblast differentiation

BMPs can trigger MSCs to activate transcription factors that are specific to their tissue origin *in vivo*, such as *Pparg* and *Runx2*, in adipogenic and osteogenic specification, respectively (Beederman et al., 2013; Wei et al., 2013). Similarly, BMP signaling activates dental pulp MSCs to express odontoblast markers (Iohara et al., 2004; Casagrande et al., 2010). Using our *in vivo* root development model, we found for the first time that in dental pulp cells, BMPs regulate different downstream targets and lead to at least three distinct cell populations: undifferentiated cells, dental pulp and odontogenic cells. We have identified transcription factors *Pax9*, *Klf4*, *Satb2* and *Lhx8* as putative mediators of downstream events leading to specific cell fates activated by BMP signaling that are associated with commitment of dental mesenchyme tissue at postnatal stages. These transcription factors are expressed in a spatially restricted pattern consistent with their involvement in determining distinct cellular fates within the dental mesenchyme. Specifically, loss of BMP signaling leads to an altered pattern of this network, suggesting that BMP signaling fine-tunes its spatial distribution, e.g. by restricting *Pax9* expression and promoting *Klf4* expression. Both *Pax9* and *Klf4* are transcription factors involved in multiple developmental events in a context-dependent manner. The tissue-specific roles of these transcription factors in odontogenesis may be determined by a unique network of transcription factors, in which *Pax9* and *Klf4* may interact



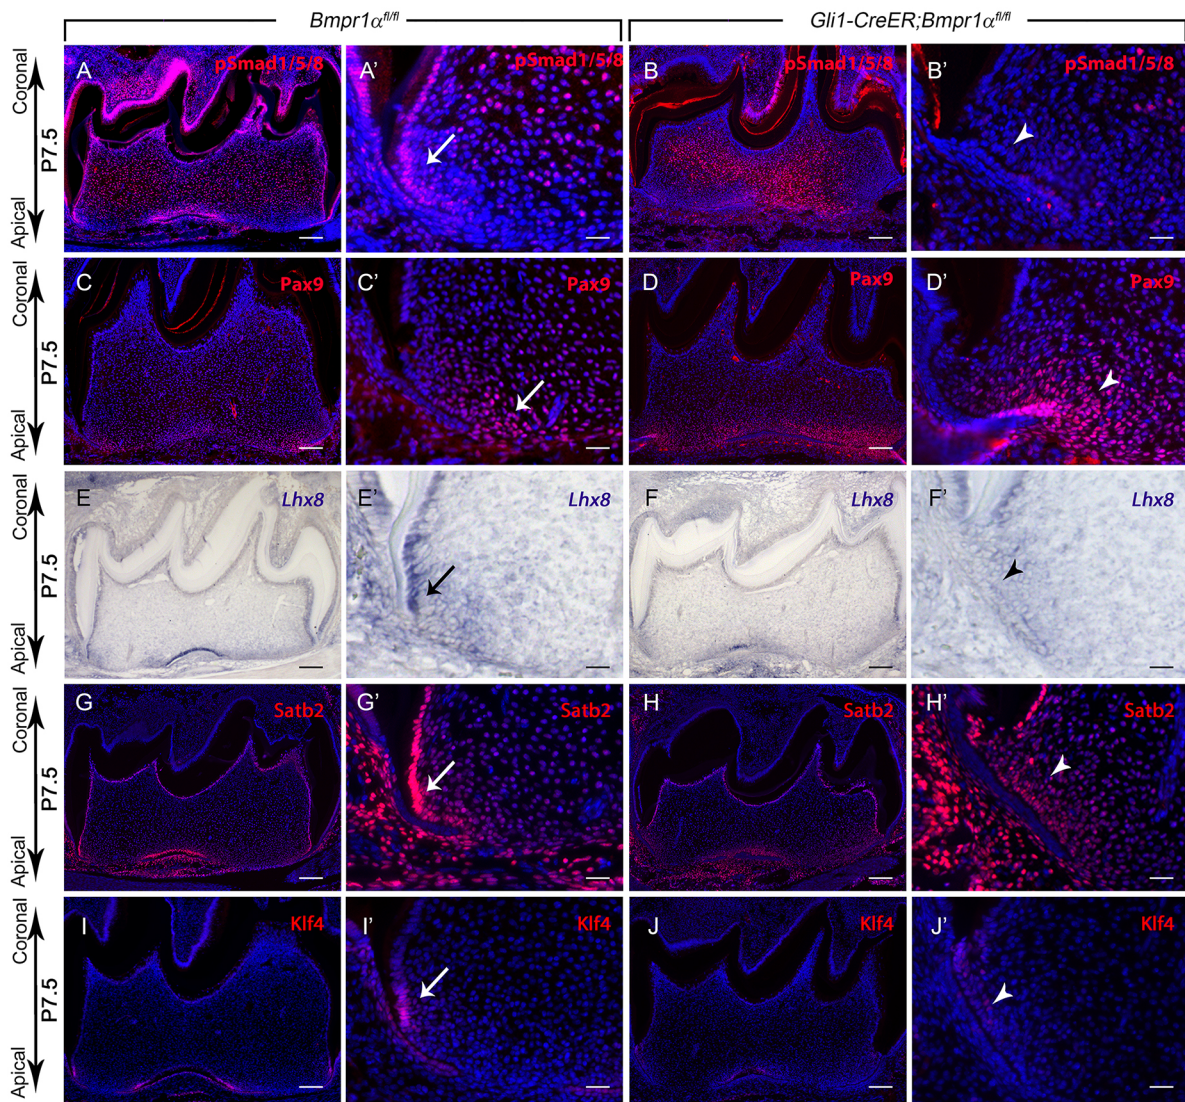

**Fig. 5. Altered spatial expression patterns of putative downstream factors after loss of BMP signaling in the molar apical mesenchyme.** Immunostaining (red) of pSmad1/5/8 (A-B') and Pax9 (C-D'); *in situ* hybridization (purple) of *Lhx8* (E-F'); and immunostaining (red) for *Satb2* (G-H') and *Klf4* (I-J') of P7.5 *Bmpr1α<sup>fl/fl</sup>* control and *Gli1-CreER;Bmpr1α<sup>fl/fl</sup>* mice induced at P3.5. A'-J' are images from A-J at higher magnification, respectively. Arrows indicate positive staining in control samples. Arrowheads indicate altered staining in targeted region of mutant samples. Scale bars: 100 μm in A-J; 25 μm in A'-J'.

with other members to determine the fate of MSCs during root development.

#### **BMP-regulated MSCs may be useful for tooth regeneration approaches**

The root structure is crucial for the ability of the tooth to perform its biological function of occlusion, and clinical treatment of root defects is challenging. Although titanium implants have been used to replace biological roots, the metal-bone osteointegration lacks the ability to respond to occlusion force. Therefore, an approach using biological tooth root replacement is desirable in clinical dentistry. Human SCAPs have been investigated for their potential use in tooth regeneration approaches (Sonoyama et al., 2006). The apical molar mesenchyme in adult mice does not appear histologically to contain a cell population resembling the human apical papilla that harbors SCAPs. However, we have identified a population of *Gli1*<sup>+</sup> cells that is similar to SCAPs in exhibiting MSC characteristics and is capable of supporting tissue growth *in vivo*. We propose that these *Gli1*<sup>+</sup> MSCs may be useful for tooth root regeneration studies in

animal models because they meet the necessary criteria of robustly supporting growth and expansion potential. Biological root formation requires a complex system involving interactions between the dental pulp, periodontium and epithelial cells. To mimic this biological process for tooth root regeneration, future studies will need to investigate the coordination between these components.

In addition, previous studies have shown that epithelial-mesenchymal interactions are crucial for tooth development as well as many other developmental processes (Li et al., 2017). At early embryonic stages, BMP signaling is relayed between the epithelium and mesenchyme as tooth development progresses. At the newborn stage, BMP signaling becomes specifically required in the mesenchyme but not in the epithelium when crown development is complete and root formation begins. BMP signaling regulates cell-specific downstream events in a context-dependent manner and generally directs stem cells to undergo differentiation according to their tissue origins, possibly through activation of lineage-specific transcription factors. We note that the BMP pathway may be a good access point for manipulating multiple pathways and identifying

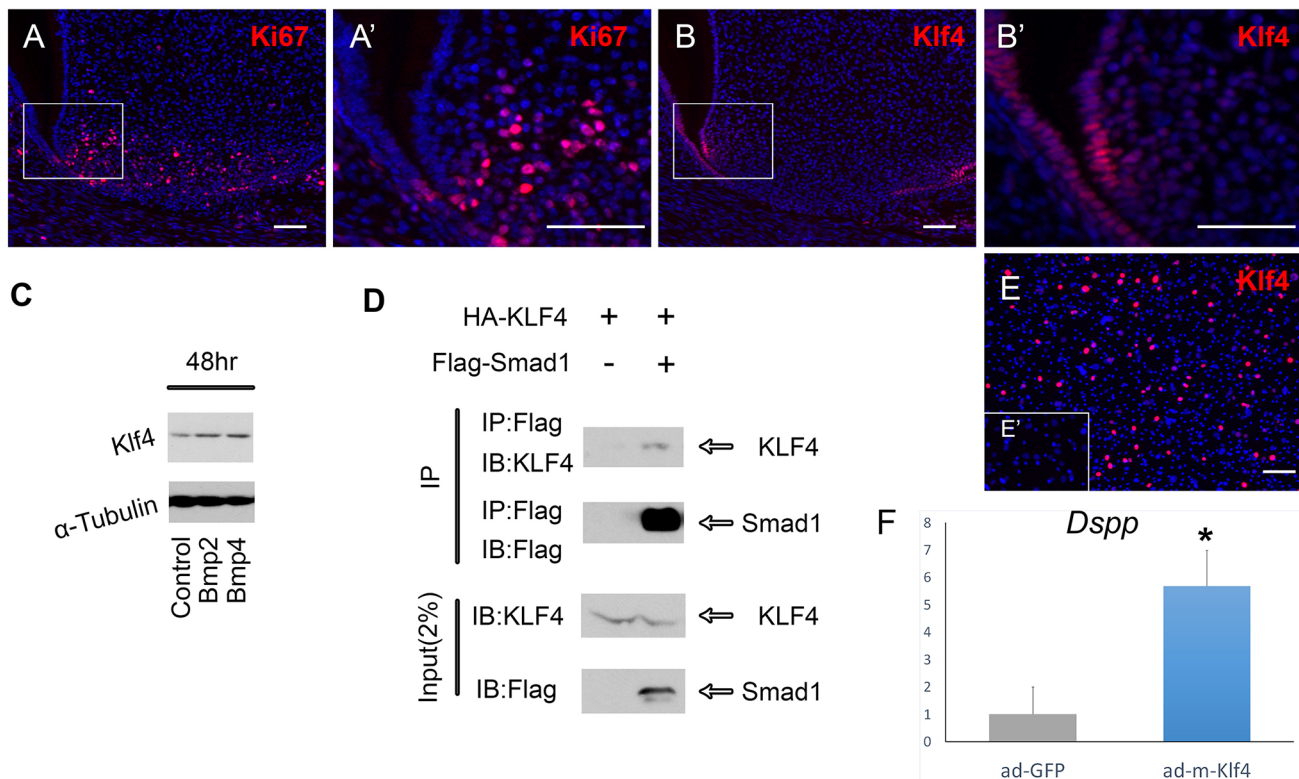

**Fig. 6. Activation of *Klf4* in dental apical mesenchyme explants activates expression of the odontoblast marker *Dspp*.** (A–B') Ki67 and *Klf4* immunostaining (red) of molars from P7.5 *Gli1-CreER;Bmpr1a<sup>fl/m</sup>* mice induced at P3.5. Boxes in A and B are shown magnified in A' and B', respectively. (C) Western blot of *Klf4* in cultured dental pulp cells from P7.5 wild-type mice treated with Bmp2 or Bmp4, or mock-treated (control). (D) Co-immunoprecipitation experiment using Flag-tagged Smad1 and HA-tagged *Klf4* expressed in 293T cells. Smad1 was immunoprecipitated (IP) and immunoblotted (IB) for association with *Klf4*. (E, E') *Klf4* immunofluorescence after treatment of dissociated wild-type apical pulp culture for 48 h with Ad-m-*Klf4* (E) or ad-GFP (E'). (F) qPCR for *Dspp* in apical pulp cultures treated with Ad-m-*Klf4* (blue bar) compared with Ad-m-GFP (gray bar).  $n=3$ . \* $P<0.05$ . Scale bars: 50  $\mu\text{m}$ .

downstream targets that are crucial for cell fate determination. Moreover, BMP regulatory mechanisms that we have begun to dissect in detail may help guide future tooth regeneration approaches.

## MATERIALS AND METHODS

### Generation of transgenic mice

The *Gli1-CreER* knock-in (JAX#007913, The Jackson Laboratory; Ahn and Joyner, 2004), *tdTomato* conditional reporter (JAX#007905, The Jackson Laboratory; Madisen et al., 2010), conditional *Bmpr1a* floxed (a gift from Sarah E. Millar, University of Pennsylvania, Philadelphia, USA; Andl et al., 2004), *K14-rtTA* (JAX#007678, The Jackson Laboratory; Xie et al., 1999), *tetO-Cre* (JAX#006234, The Jackson Laboratory) and *Gli1-LacZ* knock-in/knock-out reporter (JAX#008211, The Jackson Laboratory; Bai et al., 2002) mouse lines have all been described previously. *Gli1-LacZ* knock-in/knock-out mice were used as heterozygotes. In all studies involving animals, we used both male and female mice for our experiments. All animal studies were approved by the Institutional Animal Care and Use Committee at the University of Southern California.

### Tamoxifen and doxycycline administration

Tamoxifen (Sigma T5648) was dissolved in corn oil (Sigma C8267) at 20 mg/ml and injected intraperitoneally at a dose of 1.5 mg/10 g body weight. Doxycycline rodent diet (Harlan, TD.01306) was administered every day.

### X-gal staining and detection of $\beta$ -galactosidase activity

Samples at various stages of postnatal development were fixed in 0.2% glutaraldehyde, decalcified in 10% ethylenediaminetetraacetic acid (EDTA, pH 7.4) passed through a sucrose series, embedded in OCT compound

(Tissue-Tek) and sectioned on a cryostat at 8  $\mu\text{m}$  prior to X-gal staining for *LacZ* expression. To detect  $\beta$ -galactosidase ( $\beta$ -gal) activity in tissue sections, cryosections were stained in X-gal staining solution [2 mM  $\text{MgCl}_2$ , 0.01% sodium deoxycholate, 0.005% Nonidet P-40, 5 mM potassium ferricyanide, 5 mM potassium ferrocyanide, 20 mM Tris (pH 7.3) and 1 mg/ml X-gal in phosphate-buffered saline (PBS)] for 3–4 h at 37°C in the dark, followed by postfixation in 4% paraformaldehyde for 10 min at room temperature and counterstaining with nuclear Fast Red (Electron Microscopy Sciences, 2621203).

### RNAscope *in situ* hybridization

Postnatal mandibles were dissected and fixed in fresh 4% paraformaldehyde overnight at 4°C and then decalcified in 10% DEPC-treated EDTA (pH 7.4) for 1–2 weeks, depending on the age of the sample. Samples were passed through a sucrose series, embedded in OCT compound (Tissue-Tek) and sectioned on a cryostat at 8  $\mu\text{m}$ . Staining was carried out using the RNAscope 2.5 HD Reagent Kit-RED assay (Advanced Cell Diagnostics, 322350) according to the manufacturer's instructions. *Gli1* probe (RNAscope Probe - Mm-*Gli1*, 311001) was designed and synthesized by Advanced Cell Diagnostics.

### Histological analysis

Dissected samples were fixed in 4% paraformaldehyde overnight at 4°C and then decalcified in 10% DEPC-treated EDTA (pH 7.4) for 1–4 weeks depending on the age of the sample. Samples were passed through serial concentrations of ethanol for embedding in paraffin wax and sectioned at 7  $\mu\text{m}$  using a microtome (Leica). Deparaffinized sections were stained with Hematoxylin and Eosin using standard procedures for general morphology.

For cryosections, decalcified samples were dehydrated in 60% sucrose/PBS solution overnight at room temperature. Samples were then embedded



in OCT compound (Tissue-Tek, Sakura) and frozen onto a dry ice block to solidify. Embedded samples were cryosectioned at 7  $\mu$ m using a cryostat (Leica CM1850).

### In situ hybridization

After deparaffinization and serial hydration with ethanol, sections were treated with proteinase K (20 mg/ml) for 5 min at room temperature and post-fixed in 4% paraformaldehyde in PBS for 10 min. After treatment in 0.1 M triethanolamine with 0.25% acetic anhydride for 10 min, sections were dehydrated through serial concentrations of ethanol and air-dried. Digoxigenin labeled probes in hybridization solution were heated in a 100°C water bath for 5 min, chilled on ice and incubated with the slides in the humidified hybridization chamber at 65°C for 16 h. After hybridization, sections were treated with 1  $\mu$ g/ml RNase A (Sigma) in 2 $\times$  SSC buffer for 30 min at 37°C, and washed in three times in prewarmed 2 $\times$  SSC buffer and 0.2 $\times$  SSC buffer with 0.05% CHAPS (20 min each) at 65°C. The sections were blocked with 20% sheep serum/PBST for 2 h at room temperature and incubated with 1:5000 dilution of anti-digoxigenin- $\alpha$ p antibody (Roche, 11093274910) at 4°C overnight. After overnight incubation, sections were washed three times with PBS with 0.1% Tween 20 and 1 mM tetramisole hydrochloride for 10 min each, followed by a wash with alkaline-phosphatase buffer [100 mM NaCl, 100 mM Tris-HCl (pH 9.5), 50 mM MgCl<sub>2</sub>, and 0.1% Tween 20 in H<sub>2</sub>O]. Finally, sections were developed using the BMPurple substrate system (Roche). *Dspp* cDNA clones were kindly provided by Irma Thesleff (University of Helsinki, Finland). *Lhx8* digoxigenin-labeled anti-sense RNA probes were generated using *Lhx8* cDNA (NCBI Reference: NM\_010713.2, 541 bp-1608 bp) as a template.

### Immunostaining

Sections were immersed in preheated antigen unmasking solution (Vector, H-3300) in an Electric Pressure Cooker (976 l, Cell Marque, Sigma) at high pressure for 10 min, followed by cooling at room temperature for 30-45 min and incubation with blocking reagent (PerkinElmer, FP1012) for 1 h and then primary antibody overnight at 4°C. After three washes in PBS, sections were incubated with Alexa-conjugated secondary antibody (Invitrogen). For pSmad1/5/8, bHRP-labeled goat anti-rabbit IgG (PerkinElmer, NEF812001EA; 1:200) was used as secondary antibody and TSA kits were used for signal detection (PerkinElmer, NEL741001KT). Sections were counterstained with DAPI (Sigma, D9542). Images were captured using a fluorescence microscope (Leica DMI 3000B) with filter settings for DAPI/FITC/TRITC.

Immunostaining was carried out using the following antibodies: pSmad1/5/8 (1:500, Cell Signaling, #9511), Ki67 (1:100, Abcam, ab16667),  $\beta$ -gal (1:50, Abcam, ab9361), Pax9 (1:25, Abcam, ab28538), Satb2 (1:100, Abcam, ab92446) and Klf4 (1:25, Sigma, HPA002926). Alexa Fluor 568 and Alexa Fluor 488 (1:200, Invitrogen) were used for detection.

### Clonal culture and multipotential differentiation

The apical one-third of the dental pulp mesenchyme from the mandibular molar region of P3.5 mice was separated, minced and digested with solution containing 2 mg/ml collagenase type I (Worthington Biochemical) and 4 mg/ml dispase II (Roche Diagnostics) in PBS for 1 h at 37°C. A single-cell suspension was obtained by passing the cells through a 70  $\mu$ m strainer (BD Biosciences) and was seeded at 1 $\times$ 10<sup>5</sup>/well in six-well plate culture dishes (Corning) with  $\alpha$ -MEM supplemented with 20% FBS, 2 mM L-glutamine, 55  $\mu$ M 2-mercaptoethanol, 100 U ml<sup>-1</sup> penicillin and 100  $\mu$ g/ml streptomycin (Life Science Technologies). The culture medium was changed after an initial incubation for 48 h and the attached cells were cultured for another 14 days at 37°C under hypoxic conditions (5% O<sub>2</sub>, 5% CO<sub>2</sub>, balanced with nitrogen). Clones could be detected 7-10 days after plating.

For the differentiation assays, cells from the colonies were cultured until confluent and then induced in osteogenic, adipogenic or chondrogenic differentiation medium (05504, 05503 and 05455, Stemcell Technologies) for 2-3 weeks according to the manufacturer's instructions.

### RNA sequencing (RNA-seq) analysis

*Gli1-CreER;Bmpr1 $\alpha$ <sup>fl/fl</sup>* and *Bmpr1 $\alpha$ <sup>fl/fl</sup>* littermate control mice received tamoxifen at P3.5 days and were euthanized 4 days thereafter. The apical half of the first mandibular molar was dissected out and RNA was extracted

using the RNeasy Plus Mini Kit (74134, Qiagen). cDNA library preparation and sequencing were performed at the Epigenome Center of the University of Southern California. A total of 200 million single-end reads were obtained on Illumina NextSeq500 equipment for three pairs of samples. High-quality reads were aligned to mm10 using TopHat 2 in conjunction with a gene model from Ensembl release 61. Data were quantified by counting the number of reads over exons and normalized as RPKM (reads per kilobase per million mapped reads) (Mortazavi et al., 2008). The values were adjusted globally by matching count distributions at the 75th percentile and then adjusting counts to a uniform distribution between samples. Differential expression was estimated by selecting transcripts that displayed significant changes ( $P < 0.05$ ) after Benjamini and Hochberg correction using a null model constructed from 1% of transcripts showing the closest average level of observation to estimate experimental noise, as detailed previously (Kim et al., 2016) except that an additional replicate *t*-test was used (FDR  $P < 0.05$ ) that showed the consistency of gene expression across control and mutant groups. The gene list was further ranked using fold change criteria. For visualization, aligned reads were uploaded to Integrated Genome Viewer (IGV, Broad Institute). A two-way hierarchical clustering heat map using Euclidean distance and average linkage showed two distinct groups of genes from *Gli1-CreER;Bmpr1 $\alpha$ <sup>fl/fl</sup>* and *Bmpr1 $\alpha$ <sup>fl/fl</sup>* control mice. The raw data has been deposited with NCBI under accession number GSE79791. To investigate potential functional enrichment of various biological pathways in differentially expressed genes in RNA-seq, a ranked *P*-value was computed for each pathway from the Fisher exact test based on the binomial distribution and independence for probability of any gene belonging to any enriched set, as detailed previously (Kim et al., 2016).

### Western blot and co-immunoprecipitation

Dental pulp apical cells from the apical region of P3.5 molars were harvested 48 h after treatment with 10 ng/ml Bmp2 (355-BM-010, R&D systems) or Bmp4 (5020-BP-010, R&D systems), or mock treated with equal volume of solvent (0.1% bovine serum albumin in 4 mM HCl) as control. For immunoblotting, cells were lysed in lysis buffer [50 mM Tris-HCl (pH 7.5), 150 mM NaCl, 2 mM EDTA, 0.1% NP-40, 10% glycerol and protease inhibitor cocktail]. After protein quantification using Bio-Rad protein assays (Bio-Rad Laboratories), 20-80  $\mu$ g of protein were separated by SDS-PAGE and transferred to 0.45  $\mu$ m PVDF membrane. Membranes were blocked in TBS with 0.1% Tween 20 and 5% BSA (blocking solution) for 1 h, followed by overnight incubation with primary antibody diluted at anti-Klf4 (1:1000) in blocking solution, and 1 h incubation with HRP-conjugated secondary antibody (Jackson ImmunoResearch, 111-035-003) diluted at 1:5000. Immunoreactive protein was detected using ECL (GE Healthcare) and BioMax film (Kodak) or FluorChem E Chemiluminescent Western Blot Imaging System (Cell Biosciences).

For immunoprecipitation, HA-Klf4 (Plasmid #34593, Adgene) and Flag-Smad1 (Alliston et al., 2005) plasmids were transfected into 293T cells (Xu et al., 2013). Cells were harvested 24 or 48 h after transfection and lysed in lysis buffer [50 mM Tris-HCl (pH 7.5), 150 mM NaCl, 2 mM EDTA, 0.1% NP-40, 10% glycerol and protease inhibitor cocktail]. Lysates were subjected to immunoprecipitation with anti-Flag antibody and protein G-Sepharose 4 fast flow (GE Healthcare). Immune complexes were washed three times with lysis buffer and subjected to immunoblotting with anti-Flag (1:2000; Sigma, F1804) or anti-Klf4 (1:1000; Sigma, HPA002926) antibodies.

### Adenovirus treatment

GFP control adenovirus (Ad-GFP, 1060) and Klf4 overexpression adenovirus (Ad-m-KLF4, 1791) were purchased from Vector Biolabs. To validate the Klf4 expression after virus infection, Ad-m-KLF4 adenovirus was added to the dental pulp cell culture for 3 h. The cells were fixed in 4% PFA on ice 48 h later for 10 min and immunostained with Klf4 (1:100). For functional analysis of Klf4, the apical region of P5.5 mouse molars was cut into small pieces to facilitate virus penetration. Ad-m-KLF4 adenovirus was added to the dissociated apical pulp culture and cultured for 48 h. Five days later, RNA was extracted from cultured pulp tissues using a RNeasy Micro Kit (74004, Qiagen) and reverse-transcribed to cDNA (Sensiscript, 205211, Qiagen) for qPCR analysis using *Dspp* qPCR primers (PPM40292F, Qiagen).

### Sample size and statistics

$n=3$  for all experiments unless otherwise stated. Student's *t*-test (two-tailed) was applied for statistical analysis.  $P<0.05$  was considered statistically significant.

### Acknowledgements

We thank J. Mayo and B. Samuels for critical reading of the manuscript. We thank the Epigenome Center of the University of Southern California (USC) for performing RNA sequencing. We thank the Norris Medical Library Bioinformatics Service, funded by the USC Office of Research and the Norris Medical Library, for assisting with sequencing data analysis.

### Competing interests

The authors declare no competing or financial interests.

### Author contributions

Conceptualization: J.F., Y.C.; Methodology: J.F., Y.C.; Validation: Y.C.; Formal analysis: J.J., J.L., H.Z., V.P., T.Z., J.X., Y.C.; Investigation: J.F., J.J., J.L., H.Z., T.Z., J.X., Y.C.; Resources: Y.C.; Data curation: J.F., Y.C.; Writing - original draft: J.F., Y.C.; Writing - review & editing: J.F., Y.C.; Supervision: Y.C.; Project administration: Y.C.; Funding acquisition: Y.C.

### Funding

J.F. acknowledges training grant support from the National Institute of Dental and Craniofacial Research, the National Institutes of Health (R90 DE022528). This study was supported by grants from the National Institute of Dental and Craniofacial Research, the National Institutes of Health (R01 DE022503, R01 DE025221, R37 DE012711) to Y.C. Deposited in PMC for release after 12 months.

### Data availability

RNA sequencing data have been deposited in NCBI under accession number GSE79791.

### Supplementary information

Supplementary information available online at <http://dev.biologists.org/lookup/doi/10.1242/dev.150136.supplemental>

### References

- Ahn, S. and Joyner, A. L. (2004). Dynamic changes in the response of cells to positive hedgehog signaling during mouse limb patterning. *Cell* **118**, 505-516.
- Alliston, T., Ko, T. C., Cao, Y., Liang, Y.-Y., Feng, X.-H., Chang, C. and Derynck, R. (2005). Repression of bone morphogenetic protein and activin-inducible transcription by Evi-1. *J. Biol. Chem.* **280**, 24227-24237.
- Andl, T., Ahn, K., Kairo, A., Chu, E. Y., Wine-Lee, L., Reddy, S. T., Croft, N. J., Cebra-Thomas, J. A., Metzger, D., Chambon, P. et al. (2004). Epithelial Bmpr1a regulates differentiation and proliferation in postnatal hair follicles and is essential for tooth development. *Development* **131**, 2257-2268.
- Bai, C. B., Auerbach, W., Lee, J. S., Stephen, D. and Joyner, A. L. (2002). *Glif2*, but not *Glif1*, is required for initial Shh signaling and ectopic activation of the Shh pathway. *Development* **129**, 4753-4761.
- Beederman, M., Lamplot, J. D., Nan, G., Wang, J., Liu, X., Yin, L., Li, R., Shui, W., Zhang, H., Kim, S. H. et al. (2013). BMP signaling in mesenchymal stem cell differentiation and bone formation. *J. Biomed. Sci. Eng.* **6**, 32-52.
- Bianco, P., Robey, P. G. and Simmons, P. J. (2008). Mesenchymal stem cells: revisiting history, concepts, and assays. *Cell Stem Cell* **2**, 313-319.
- Calvi, L. M. and Link, D. C. (2015). The hematopoietic stem cell niche in homeostasis and disease. *Blood* **126**, 2443-2451.
- Casagrande, L., Demarco, F. F., Zhang, Z., Araujo, F. B., Shi, S. and Nor, J. E. (2010). Dentin-derived BMP-2 and odontoblast differentiation. *J. Dent. Res.* **89**, 603-608.
- Chung, I.-H., Yamaza, T., Zhao, H., Choung, P.-H., Shi, S. and Chai, Y. (2009). Stem cell property of postmigratory cranial neural crest cells and their utility in alveolar bone regeneration and tooth development. *Stem Cells* **27**, 866-877.
- Crisan, M., Yap, S., Casteilla, L., Chen, C.-W., Corselli, M., Park, T. S., Andriolo, G., Sun, B., Zheng, B., Zhang, L. et al. (2008). A perivascular origin for mesenchymal stem cells in multiple human organs. *Cell Stem Cell* **3**, 301-313.
- Dominici, M., Le Blanc, K., Mueller, I., Slaper-Cortenbach, I., Marini, F. C., Krause, D. S., Deans, R. J., Keating, A., Prockop, D. J. and Horwitz, E. M. (2006). Minimal criteria for defining multipotent mesenchymal stromal cells. The International Society for Cellular Therapy position statement. *Cytotherapy* **8**, 315-317.
- Feng, J., Mantesso, A., De Bari, C., Nishiyama, A. and Sharpe, P. T. (2011). Dual origin of mesenchymal stem cells contributing to organ growth and repair. *Proc. Natl Acad. Sci. USA* **108**, 6503-6508.
- Friedenstein, A. J., Petrakova, K. V., Kurolesova, A. I. and Frolova, G. P. (1968). Heterotopic of bone marrow. Analysis of precursor cells for osteogenic and hematopoietic tissues. *Transplantation* **6**, 230-247.
- Friedenstein, A. J., Gorskaja, J. F. and Kulagina, N. N. (1976). Fibroblast precursors in normal and irradiated mouse hematopoietic organs. *Exp. Hematol.* **4**, 267-274.
- Gronthos, S., Mankani, M., Brahimi, J., Robey, P. G. and Shi, S. (2000). Postnatal human dental pulp stem cells (DPSCs) in vitro and in vivo. *Proc. Natl Acad. Sci. USA* **97**, 13625-13630.
- He, X. C., Zhang, J., Tong, W.-G., Tawfik, O., Ross, J., Scoville, D. H., Tian, Q., Zeng, X., He, X., Wiedemann, L. M. et al. (2004). BMP signaling inhibits intestinal stem cell self-renewal through suppression of Wnt- $\beta$ -catenin signaling. *Nat. Genet.* **36**, 1117-1121.
- Helms, A. W. and Johnson, J. E. (2003). Specification of dorsal spinal cord interneurons. *Curr. Opin. Neurobiol.* **13**, 42-49.
- Hu, B., Wu, Z., Liu, T., Ullenbruch, M. R., Jin, H. and Phan, S. H. (2007). Gut-enriched Krüppel-like factor interaction with Smad3 inhibits myofibroblast differentiation. *Am. J. Respir. Cell Mol. Biol.* **36**, 78-84.
- Iohara, K., Nakashima, M., Ito, M., Ishikawa, M., Nakasima, A. and Akamine, A. (2004). Dentin regeneration by dental pulp stem cell therapy with recombinant human bone morphogenetic protein 2. *J. Dent. Res.* **83**, 590-595.
- Juuri, E., Saito, K., Ahtiainen, L., Seidel, K., Tummers, M., Hochedlinger, K., Klein, O. D., Thesleff, I. and Michon, F. (2012). Sox2+ stem cells contribute to all epithelial lineages of the tooth via Sfrp5+ progenitors. *Dev. Cell* **23**, 317-328.
- Kim, K., Punj, V., Kim, J.-M., Lee, S., Ulmer, T. S., Lu, W., Rice, J. C. and An, W. (2016). MMP-9 facilitates selective proteolysis of the histone H3 tail at genes necessary for proficient osteoclastogenesis. *Genes Dev.* **30**, 208-219.
- Li, J., Feng, J., Liu, Y., Ho, T.-V., Grimes, W., Ho, H. A., Park, S., Wang, S. and Chai, Y. (2015). BMP-SHH signaling network controls epithelial stem cell fate via regulation of its niche in the developing tooth. *Dev. Cell* **33**, 125-135.
- Li, J., Parada, C., Harunaga, J. and Chai, Y. (2017). Cellular and molecular mechanisms of tooth root development. *Development* **144**, 374-384.
- Liu, Y., Feng, J., Li, J., Zhao, H., Ho, T.-V. and Chai, Y. (2015). An Nfic-hedgehog signaling cascade regulates tooth root development. *Development* **142**, 3374.
- Madisen, L., Zwingman, T. A., Sunkin, S. M., Oh, S. W., Zariwala, H. A., Gu, H., Ng, L. L., Palmiter, R. D., Hawrylycz, M. J., Jones, A. R. et al. (2010). A robust and high-throughput Cre reporting and characterization system for the whole mouse brain. *Nat. Neurosci.* **13**, 133-140.
- Mortazavi, A., Williams, B. A., McCue, K., Schaeffer, L. and Wold, B. (2008). Mapping and quantifying mammalian transcriptomes by RNA-Seq. *Nat. Methods* **5**, 621-628.
- Shi, S. and Gronthos, S. (2003). Perivascular niche of postnatal mesenchymal stem cells in human bone marrow and dental pulp. *J. Bone Miner. Res.* **18**, 696-704.
- Sonoyama, W., Liu, Y., Fang, D., Yamaza, T., Seo, B.-M., Zhang, C., Liu, H., Gronthos, S., Wang, C.-Y., Shi, S. et al. (2006). Mesenchymal stem cell-mediated functional tooth regeneration in swine. *PLoS ONE* **1**, e79.
- Sonoyama, W., Liu, Y., Yamaza, T., Tuan, R. S., Wang, S., Shi, S. and Huang, G. T.-J. (2008). Characterization of the apical papilla and its residing stem cells from human immature permanent teeth: a pilot study. *J. Endod.* **34**, 166-171.
- Stemple, D. L. and Anderson, D. J. (1992). Isolation of a stem cell for neurons and glia from the mammalian neural crest. *Cell* **71**, 973-985.
- Tucker, A. and Sharpe, P. (2004). The cutting-edge of mammalian development; how the embryo makes teeth. *Nat. Rev. Genet.* **5**, 499-508.
- Wei, X., Li, G., Yang, X., Ba, K., Fu, Y., Fu, N., Cai, X., Li, G., Chen, Q., Wang, M. et al. (2013). Effects of bone morphogenetic protein-4 (BMP-4) on adipocyte differentiation from mouse adipose-derived stem cells. *Cell Prolif.* **46**, 416-424.
- Xie, W., Chow, L. T., Paterson, A. J., Chin, E. and Kudlow, J. E. (1999). Conditional expression of the ErbB2 oncogene elicits reversible hyperplasia in stratified epithelia and up-regulation of TGF $\alpha$  expression in transgenic mice. *Oncogene* **18**, 3593-3607.
- Xu, J., Wang, A. H., Oses-Prieto, J., Makhijani, K., Katsuno, Y., Pei, M., Yan, L., Zheng, Y. G., Burlingame, A., Brückner, K. et al. (2013). Arginine methylation initiates BMP-induced Smad signaling. *Mol. Cell* **51**, 5-19.
- Zhang, J., Fei, T., Li, Z., Zhu, G., Wang, L. and Chen, Y.-G. (2013). BMP induces coxlin expression to facilitate self-renewal and suppress neural differentiation of mouse embryonic stem cells. *J. Biol. Chem.* **288**, 8053-8060.
- Zhao, H., Feng, J., Seidel, K., Shi, S., Klein, O., Sharpe, P. and Chai, Y. (2014). Secretion of Shh by a neurovascular bundle niche supports mesenchymal stem cell homeostasis in the adult mouse incisor. *Cell Stem Cell* **14**, 160-173.
- Zhao, H., Feng, J., Ho, T.-V., Grimes, W., Urata, M. and Chai, Y. (2015). The suture provides a niche for mesenchymal stem cells of craniofacial bones. *Nat. Cell Biol.* **17**, 386-396.
